# Supplementary material
Source: PubMed Central journal article supplement (PMC5902591)
Supplement: MCB.00001-18_zmb999101739s1.pdf [file MCB.00001-18_zmb999101739s1.pdf]

# SUPPLEMENTRY FIGURE 1

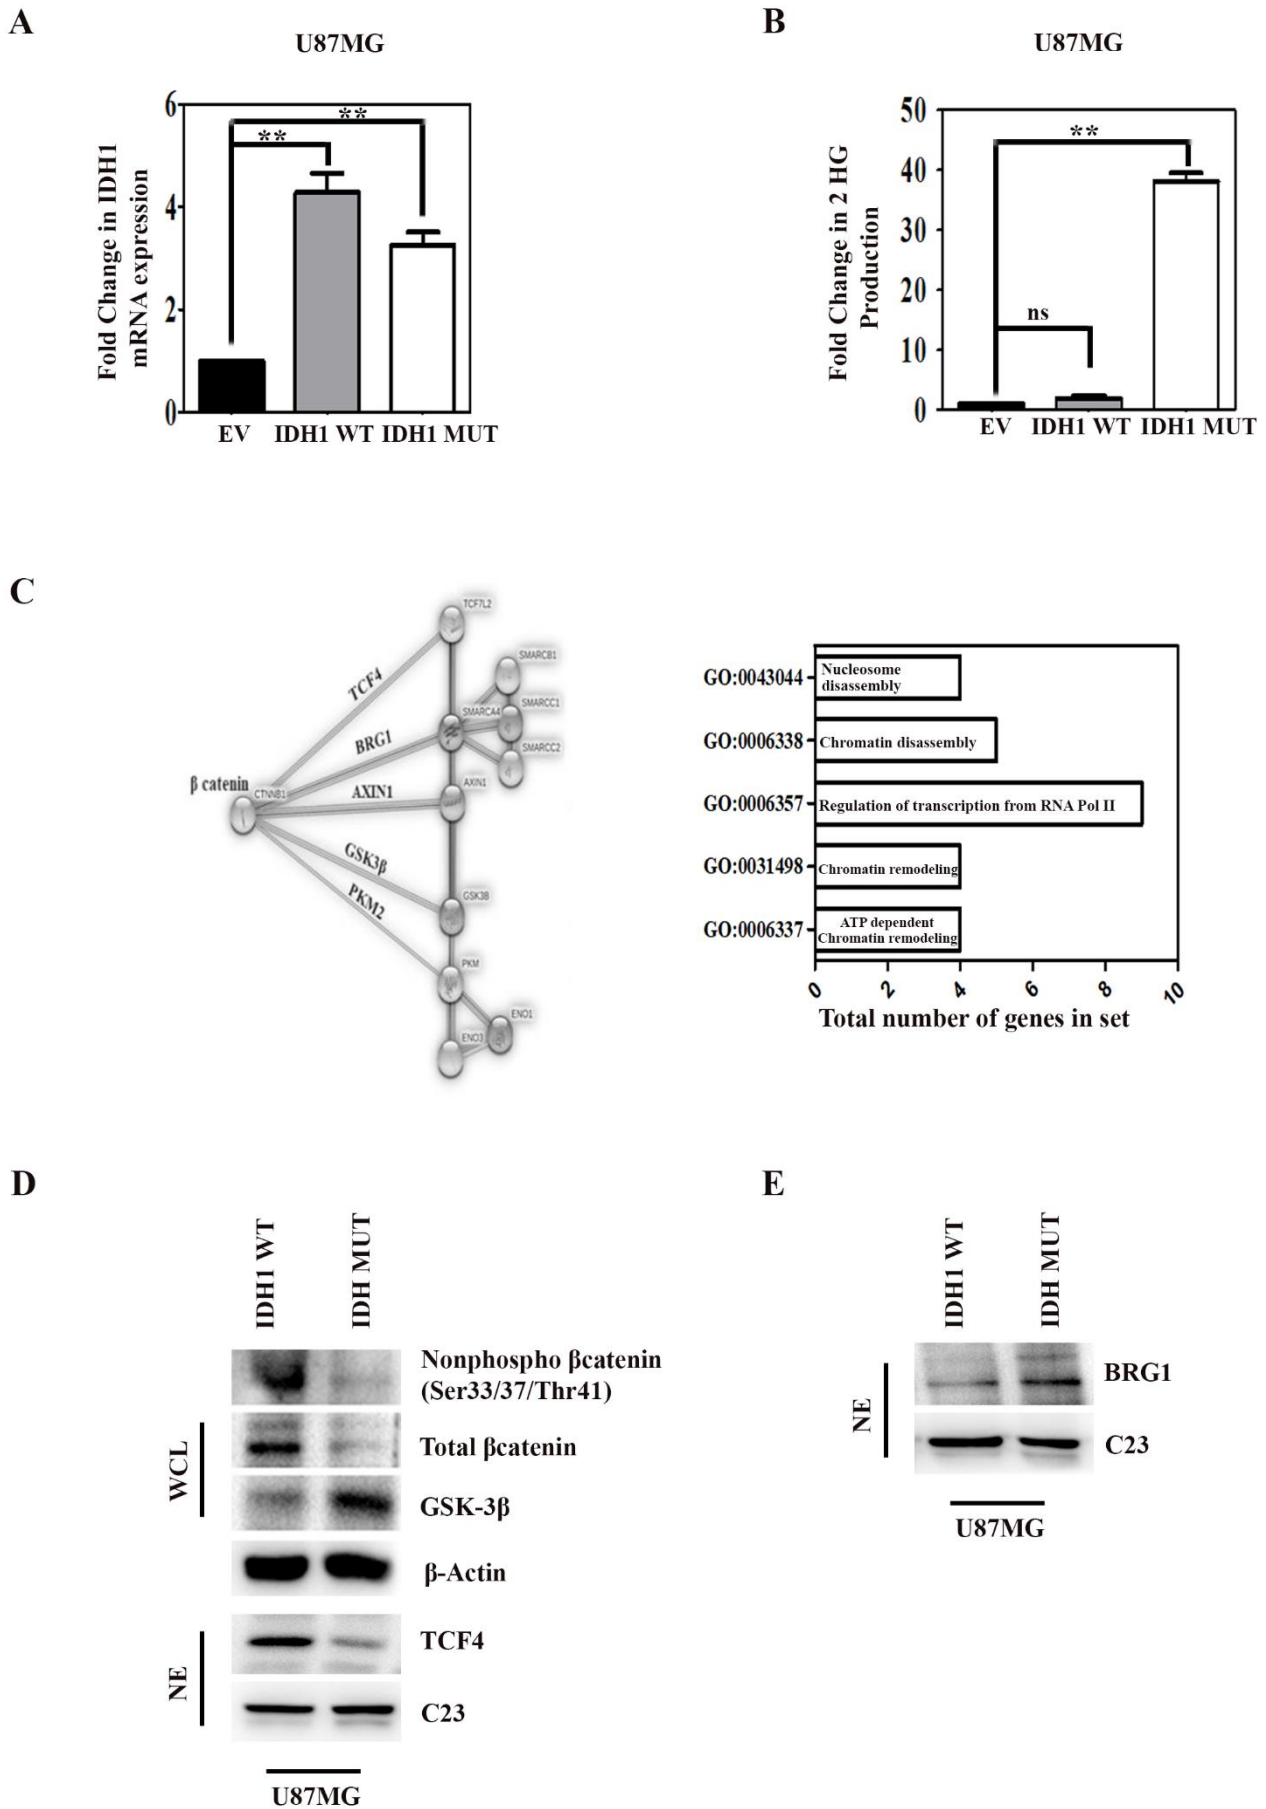

**Supplementary Figure 1. IDH1-MT has deregulated  $\beta$ -catenin network.**

(A) Graph showing fold change in IDH1 mRNA expression in IDH1-WT and IDH1-MT with respect to empty vector. (B) The graph shows fold change in 2-HG production in expression in IDH1-WT and IDH1-MT with respect to empty vector. Values represent  $\pm$ SEM from three independent experiments. p-values were determined by 2-tailed, paired t-test using GraphPad Prism. (C) STRING analysis demonstrating the interactome of PKM2,  $\beta$ -catenin, TCF4, BRG1, GSK3 $\beta$  and AXIN1. The network comprises of  $\beta$ -catenin and its interacting partners associated with chromatin remodeling and RNA polymerase II regulation. (D) Western blots demonstrating the status of non-phospho  $\beta$ -catenin, total  $\beta$ -catenin, GSK3 $\beta$  and TCF4 levels in IDH1-WT and IDH1-MT glioma cells. (E) Western blot demonstrating the status of BRG1 levels in IDH1-WT and IDH1-MT glioma cells. Symbols: \*\* (p<0.01), ns (non-significant).
